# Supplementary material for: Comparing Visually Assessed BI-RADS Breast Density and Automated Volumetric Breast Density Software: A Cross-Sectional Study in a Breast Cancer Screening Setting
Source: PLOS journal article supplement (doi:10.1371/journal.pone.0136667), 2015-09-03
Supplement: S1 (10.1371/journal.pone.0136667.s001) [file journal.pone.0136667.s001]

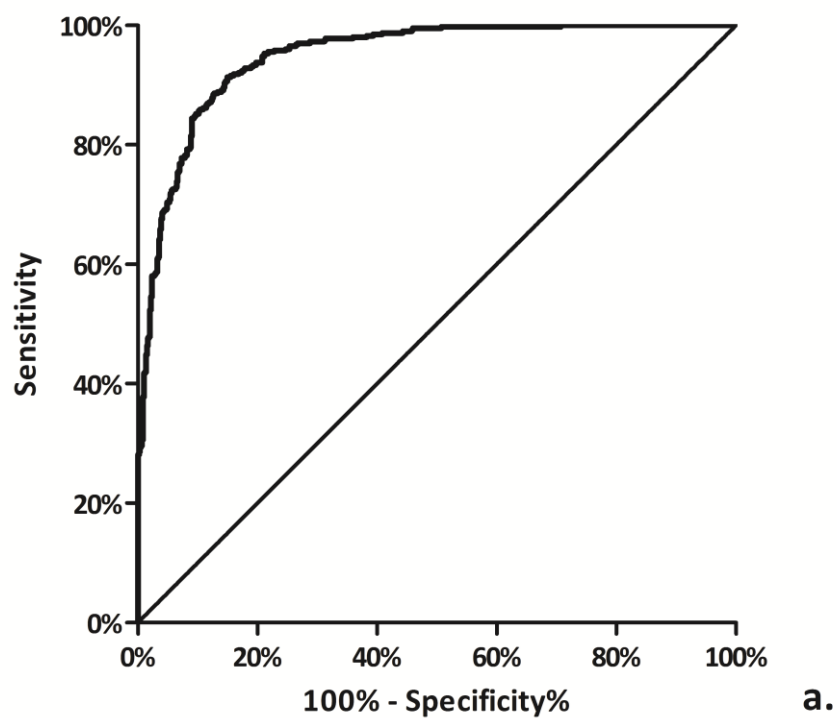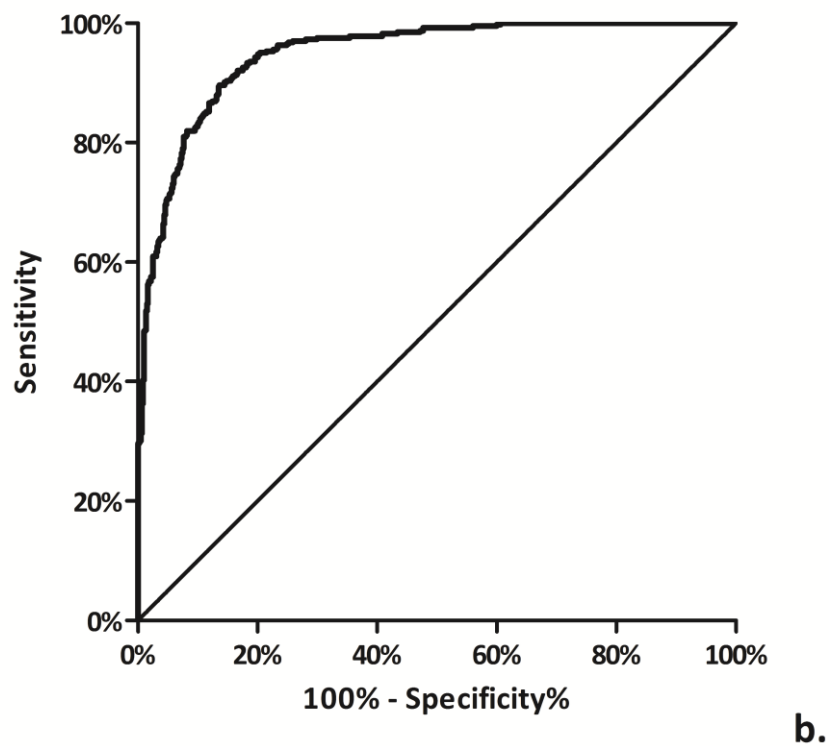

**Supplementary figure 1** – ROC analyses on predicting high density (BI-RADS c+d) with percent dense volume (a) and absolute dense volume (b)
